# Supplementary material
Source: publisher site journal article supplement (https://www.dovepress.com/get_supplementary_file.php?f=432568.docx)
Supplement: Supplementary file 1 [file get_supplementary_file.php]

## Supplementary materials

### Supplementary material 1: Stakeholder saliency survey

In the next part, you will see a list of potential individuals or organisations that could be relevant for putting RE-SAMPLE into practice. We will ask you three questions about their potential influence in the implementation process:

1) the power and influence of each individual or organisation in this process
2) whether it is correct and justifiable to include each individual or organisation in this process
3) how urgent it is to take the needs and wishes of each individual or organisation into account in this process

Some of the individuals or organisations will have less or more power to influence the process of putting RE-SAMPLE into practice. An individual or organisation that has more power will be able to influence other parties to take actions they normally would not take.

To what degree do the following individuals or organisations have **power to influence the success** of putting RE-SAMPLE into practice?
Please rate each individual or organisation on a scale of 1 (not at all) to 5 (very much).
It may be the case that some individuals or organisations are not applicable for your country. If so, please indicate this.

| Power | 1 | 2 | 3 | 4 | 5 | Not applicable in my country |
| --- | --- | --- | --- | --- | --- | --- |
| COPD patient |  |  |  |  |  |  |
| Informal caregiver (family members or close people) |  |  |  |  |  |  |
| General Practitioner |  |  |  |  |  |  |
| Pulmonologist |  |  |  |  |  |  |
| Pulmonary nurse |  |  |  |  |  |  |
| Specialised nurses at outpatient department |  |  |  |  |  |  |
| Physiotherapist |  |  |  |  |  |  |
| Psychologist/Psychiatrist |  |  |  |  |  |  |
| Cardiologist |  |  |  |  |  |  |
| Diabetologist |  |  |  |  |  |  |
| Nutritionist |  |  |  |  |  |  |
| Radiologist |  |  |  |  |  |  |
| Nephrologist |  |  |  |  |  |  |
| Other (health) specialists in general |  |  |  |  |  |  |
| Pharmacist |  |  |  |  |  |  |
| Head of pulmonary outpatient department |  |  |  |  |  |  |
| Hospital board |  |  |  |  |  |  |
| Innovation manager |  |  |  |  |  |  |
| Legal department |  |  |  |  |  |  |
| Management of Laboratory |  |  |  |  |  |  |
| Hospital purchasing department |  |  |  |  |  |  |
| Information specialist |  |  |  |  |  |  |
| ICT department |  |  |  |  |  |  |
| Insurance company |  |  |  |  |  |  |
| Region/ State Institution |  |  |  |  |  |  |
| Social ministry |  |  |  |  |  |  |
| USCAR (Service to assess whether COVID patients are hospitalised) |  |  |  |  |  |  |

Some individuals or organisations have a right to be heard and involved in the process of putting RE-SAMPLE into practice, based on societal norms, values and beliefs. It is therefore correct and justifiable that we take these individuals or organisations into account when putting RE-SAMPLE into practice.

To what degree is it **correct and justifiable** that we involve the following individuals or organisations when putting RE-SAMPLE into practice?
Please rate each individual or organisation on a scale of 1 (not at all) to 5 (very much).

It may be the case that some individuals or organisations are not applicable for your country. If so, please indicate this.

| Justifiability | 1 | 2 | 3 | 4 | 5 | Not applicable in my country |
| --- | --- | --- | --- | --- | --- | --- |
| COPD patient |  |  |  |  |  |  |
| Informal caregiver (family members or close people) |  |  |  |  |  |  |
| General Practitioner |  |  |  |  |  |  |
| Pulmonologist |  |  |  |  |  |  |
| Pulmonary nurse |  |  |  |  |  |  |
| Specialised nurses at outpatient department |  |  |  |  |  |  |
| Physiotherapist |  |  |  |  |  |  |
| Psychologist/Psychiatrist |  |  |  |  |  |  |
| Cardiologist |  |  |  |  |  |  |
| Diabetologist |  |  |  |  |  |  |
| Nutritionist |  |  |  |  |  |  |
| Radiologist |  |  |  |  |  |  |
| Nephrologist |  |  |  |  |  |  |
| Other (health) specialists in general |  |  |  |  |  |  |
| Pharmacist |  |  |  |  |  |  |
| Head of pulmonary outpatient department |  |  |  |  |  |  |
| Hospital board |  |  |  |  |  |  |
| Innovation manager |  |  |  |  |  |  |
| Legal department |  |  |  |  |  |  |
| Management of Laboratory |  |  |  |  |  |  |
| Hospital purchasing department |  |  |  |  |  |  |
| Information specialist |  |  |  |  |  |  |
| ICT department |  |  |  |  |  |  |
| Insurance company |  |  |  |  |  |  |
| Region/ State Institution |  |  |  |  |  |  |
| Social ministry |  |  |  |  |  |  |
| USCAR (Service to assess whether COVID patients are hospitalised) |  |  |  |  |  |  |

Some individuals or organisations are considered more urgent than other individuals or organisations, when putting RE-SAMPLE into practice. For individuals or organisations that have a high urgency, it is important that their needs require immediate attention or action.

To what degree do the needs of the following individuals or organisation **call for immediate action**, when putting RE-SAMPLE into practice?
Please rate each individual or organisation on a scale of 1 (not at all) to 5 (very much).
It may be the case that some individuals or organisations are not applicable for your country. If so, please indicate this.

| Urgency | 1 | 2 | 3 | 4 | 5 | Not applicable in my country |
| --- | --- | --- | --- | --- | --- | --- |
| COPD patient |  |  |  |  |  |  |
| Informal caregiver (family members or close people) |  |  |  |  |  |  |
| General Practitioner |  |  |  |  |  |  |
| Pulmonologist |  |  |  |  |  |  |
| Pulmonary nurse |  |  |  |  |  |  |
| Specialised nurses at outpatient department |  |  |  |  |  |  |
| Physiotherapist |  |  |  |  |  |  |
| Psychologist/Psychiatrist |  |  |  |  |  |  |
| Cardiologist |  |  |  |  |  |  |
| Diabetologist |  |  |  |  |  |  |
| Nutritionist |  |  |  |  |  |  |
| Radiologist |  |  |  |  |  |  |
| Nephrologist |  |  |  |  |  |  |
| Other (health) specialists in general |  |  |  |  |  |  |
| Pharmacist |  |  |  |  |  |  |
| Head of pulmonary outpatient department |  |  |  |  |  |  |
| Hospital board |  |  |  |  |  |  |
| Innovation manager |  |  |  |  |  |  |
| Legal department |  |  |  |  |  |  |
| Management of Laboratory |  |  |  |  |  |  |
| Hospital purchasing department |  |  |  |  |  |  |
| Information specialist |  |  |  |  |  |  |
| ICT department |  |  |  |  |  |  |
| Insurance company |  |  |  |  |  |  |
| Region/ State Institution |  |  |  |  |  |  |
| Social ministry |  |  |  |  |  |  |
| USCAR (Service to assess whether COVID patients are hospitalised) |  |  |  |  |  |  |

Are there stakeholder groups not included in this list that are relevant for RE-SAMPLE? If so, could you please indicate which stakeholders are missing in the text field below?

__________________________________________________________
